# Supplementary material for: The story of lead: a context for learning about responsible research and innovation (RRI) in the chemistry classroom
Source: Royal Society of Chemistry journal article supplement (doi:10.1039/c6rp00177g), 2016-01-01
Supplement: c6rp00177g1.pdf [file c6rp00177g1.pdf]

The Story of Lead: On-line resources for students and teachers

1. The chemical properties of Lead

<https://en.wikipedia.org/wiki/Lead>

2. Toxicology of Lead

<http://www.toxipedia.org/display/toxipedia/Lead>

3. Cosmos A Spacetime Odyssey - Episode 7

A video about Clair Peterson (1922-1995), who campaigned against the oil industry's use of leaded gasoline

<https://www.youtube.com/watch?v=dyNRQOpLdu8>

The relevant minutes are

16:35 - 18:00

31:30 - 40:00

41:30 - 45:00
